# Supplementary material for: Trypanosoma cruzi Infection in Neotropical Wild Carnivores (Mammalia: Carnivora): At the Top of the T. cruzi Transmission Chain
Source: PubMed Central journal article supplement (PMC3701642; doi:10.1371/journal.pone.0067463), 2013-07-04
Supplement: pone.0067463.s002.pdf [file pone.0067463.s002.pdf]

## Supporting Information

**Table S1. *Trypanosoma cruzi* infection rates in Brazil and species' diet.**

| Species                      | <i>T. cruzi</i> infection<br>P/N (%) <sup>1</sup> | Species diet <sup>2</sup> |        | Study site | References                |                  |
|------------------------------|---------------------------------------------------|---------------------------|--------|------------|---------------------------|------------------|
|                              |                                                   | PM (%)                    | PI (%) |            | <i>T. cruzi</i> infection | Diet             |
| <i>Cerdocyon thous</i>       | 9/27 (33)                                         | 17.5                      | 25.9   | Araguari   | this study                | Lemos et al 2011 |
| <i>Cerdocyon thous</i>       | 19/30 (60)                                        | 6.4                       | 33.4   | Pantanal   | this study                | Bianchi 2009     |
| <i>Cerdocyon thous</i>       | 16/42 (38)                                        | 6.4                       | 33.4   | Pantanal   | Herrera et al 2011        | Bianchi 2009     |
| <i>Chrysocyon brachyurus</i> | 8/39 (21)                                         | 24.4                      | 4.3    | Canastra   | Rocha et al 2013          | Queirolo 2007    |
| <i>Chrysocyon brachyurus</i> | 11/43 (26)                                        | 24.4                      | 4.3    | Canastra   | this study                | Queirolo 2007    |
| <i>Leopardus pardalis</i>    | 3/10 (30)                                         | 46.4                      | 6.7    | Pantanal   | Herrera et al 2011        | Bianchi 2009     |
| <i>Lycalopex vetulus</i>     | 15/21 (71)                                        | 5.5                       | 70.4   | Araguari   | this study                | Lemos et al 2011 |
| <i>Nasua nasua</i>           | 21/44 (48)                                        | 1.5                       | 46.6   | Pantanal   | this study                | Bianchi 2009     |
| <i>Nasua nasua</i>           | 101/158 (64)                                      | 1.5                       | 46.6   | Pantanal   | Herrera et al. 2008       | Bianchi 2009     |
| <i>Nasua nasua</i>           | 75/140 (54)                                       | 1.5                       | 46.6   | Pantanal   | Alves et al 2011          | Bianchi 2009     |
| <i>Procyon cancrivorus</i>   | 9/12 (75)                                         | 3.3                       | 32.2   | Pantanal   | this study                | Gatti 2006       |

Footnotes:

<sup>1</sup> *T. cruzi* infection based on Indirect Immunofluorescent Antibody Test (IFAT): Positive/Total number of examined (% positive)

<sup>2</sup> Species diet: PM – proportion of mammals; PI – proportion of invertebrates

## References - Table S1

Alves FM, Olifiers N, Bianchi RC, Duarte AC, Cotias PM, D'Andrea PS, Gompper ME, Mourao GM, Herrera HM, Jansen AM (2011) Modulating variables of *Trypanosoma cruzi* and *Trypanosoma evansi* transmission in free-ranging coati (*Nasua nasua*) from the Brazilian Pantanal region. Vector Borne Zoonotic Dis 11: 835-841.

- Bianchi, R. C. (2009) Ecologia de mesocarnívoros em uma área no Pantanal Central, Mato Grosso do Sul. [Phd thesis]. Corumbá: Federal University of Mato Grosso do Sul. 193 p. Available: <http://www.cpap.embrapa.br/teses/online/TSE44.pdf>.
- Gatti A, Bianchi R, Rosa CRX, Mendes SL (2006) Diet of two sympatric carnivores, *Cerdocyon thous* and *Procyon cancrivorus*, in a restinga area of Espírito Santo State, Brazil. *Journal of Tropical Ecology* 22: 227–30.
- Herrera HM, Rocha FL, Lisboa CV, Rademaker V, Mourao GM, Jansen AM (2011) Food web connections and the transmission cycles of *Trypanosoma cruzi* and *Trypanosoma evansi* (Kinetoplastida, Trypanosomatidae) in the Pantanal Region, Brazil. *Trans R Soc Trop Med Hyg* 105: 380-387.
- Herrera HM, Lisboa CV, Pinho AP, Olifiers N, Bianchi RC, Rocha FL, Mourao GM, Jansen AM (2008) The coati (*Nasua nasua*, Carnivora, Procyonidae) as a reservoir host for the main lineages of *Trypanosoma cruzi* in the Pantanal region, Brazil. *Trans R Soc Trop Med Hyg* 102: 1133-1139.
- Lemos FG, Facure KG, Azevedo FC (2011) A first approach to the comparative ecology of the hoary fox and the crab-eating fox in a fragmented human altered landscape in the Cerrado Biome at Central Brazil. In: Rosalino LM, Gheler-Costa C, editors. *Middle-sized carnivores in agricultural landscapes*. New York: Nova Sciences Publishers. pp. 143-160.
- Queirolo D, Motta-Junior JC (2007) Prey availability and diet of maned wolf in Serra da Canastra National Park, southeastern Brazil. *Acta Theriologica* 52: 391-402.
- Rocha FL, Roque AL, Arrais RC, Santos JP, Lima VD, Xavier SC, Cordeiro-Estrela P, D'Andrea PS, Jansen AM (2013) *Trypanosoma cruzi* TcI and TcII transmission among wild carnivores, small mammals and dogs in a conservation unit and surrounding areas, Brazil. *Parasitology* 140: 160-170.
