# Supplementary material for: Trypanosoma cruzi Infection in Neotropical Wild Carnivores (Mammalia: Carnivora): At the Top of the T. cruzi Transmission Chain
Source: PubMed Central journal article supplement (PMC3701642; doi:10.1371/journal.pone.0067463), 2013-07-04
Supplement: pone.0067463.s003.pdf [file pone.0067463.s003.pdf]

**Table S2. *Trypanosoma cruzi* infectiveness rates (%) of Neotropical wild carnivores from this study and literature records.** Infectiveness rate (INF) for each species based on parasitological tests (hemoculture, xenodiagnosis or fresh blood examination) was calculated by total positive/total examined\*100.

| Species <sup>a</sup>                    | N         | POS      | NEG | (%)        | Site                | Country   | Reference                   |
|-----------------------------------------|-----------|----------|-----|------------|---------------------|-----------|-----------------------------|
| <b>Family CANIDAE</b>                   |           |          |     |            |                     |           |                             |
| <i>Cerdocyon thous</i>                  | 30        | 0        | 30  | 0          | Pantanal            | Brazil    | this study                  |
| <i>Cerdocyon thous</i>                  | 3         | 0        | 3   | 0          | Canastra            | Brazil    | Rocha et al. 2013           |
| <i>Cerdocyon thous</i>                  | 42        | 0        | 42  | 0          | Pantanal            | Brazil    | Herrera et al. 2011         |
| <i>Cerdocyon thous</i>                  | 1         | 0        | 1   | 0          | Corrientes          | Argentina | Bar et al. 1999             |
| <i>Cerdocyon thous</i>                  | 5         | 0        | 5   | 0          | Pará                | Brazil    | Lainson et al. 1979         |
| <i>Cerdocyon thous</i>                  | 5         | 1        | 4   | 20         | São Paulo           | Brazil    | Albuquerque & Barretto 1968 |
| <b>INF <i>Cerdocyon thous</i></b>       | <b>86</b> | <b>1</b> |     | <b>1.2</b> |                     |           |                             |
| <i>Chrysocyon brachyurus</i>            | 30        | 0        | 30  | 0          | Canastra            | Brazil    | Rocha et al. 2013           |
| <b>INF <i>Chrysocyon brachyurus</i></b> | <b>30</b> | <b>0</b> |     | <b>0</b>   |                     |           |                             |
| <i>Lycalopex culpaeus</i>               | 77        | 4        | 77  | 5          | -                   | Chile     | Neghme & Schenone 1962      |
| <i>Lycalopex culpaeus</i>               | 15        | 1        | 14  | 7          | Freirinha           | Chile     | Whiting 1946                |
| <i>Lycalopex culpaeus</i>               | 2         | 1        | 1   | 50         | Jujuy               | Argentina | Mazza 1940                  |
| <b>INF <i>Lycalopex culpaeus</i></b>    | <b>94</b> | <b>6</b> |     | <b>6.4</b> |                     |           |                             |
| <i>Lycalopex griseus</i>                | 1         | 0        | 1   | 0          | Santiago del Estero | Argentina | Wisnivesky-Colli et al 1992 |
| <i>Lycalopex griseus</i>                | 29        | 2        | 27  | 7          | Freirinha           | Chile     | Whiting 1946                |
| <b>INF <i>Lycalopex griseus</i></b>     | <b>30</b> | <b>2</b> |     | <b>6.7</b> |                     |           |                             |
| <i>Lycalopex gymnocercus</i>            | 1         | 0        | 1   | 0          | Santiago del Estero | Argentina | Cardinal et al. 2008        |
| <i>Lycalopex gymnocercus</i>            | 5         | 0        | 5   | 0          | Santiago del Estero | Argentina | Ceballos et al. 2006        |
| <i>Lycalopex gymnocercus</i>            | 3         | 0        | 3   | 0          | Corrientes          | Argentina | Bar et al. 1999             |
| <i>Lycalopex gymnocercus</i>            | 1         | 0        | 1   | 0          | Santiago del Estero | Argentina | Wisnivesky-Colli et al 1992 |
| <i>Lycalopex gymnocercus</i>            | 3         | 0        | 3   | 0          | Jujuy               | Argentina | Schweigmann et al. 1992     |
| <i>Lycalopex gymnocercus</i>            | 1         | 1        | 0   | 100        | Salta               | Argentina | Mazza 1940                  |
| <b>INF <i>Lycalopex gymnocercus</i></b> | <b>14</b> | <b>1</b> |     | <b>7.1</b> |                     |           |                             |

| Species <sup>a</sup>                  | N          | POS      | NEG | (%)         | Site                | Country   | Reference                   |
|---------------------------------------|------------|----------|-----|-------------|---------------------|-----------|-----------------------------|
| <b>Family CANIDAE</b>                 |            |          |     |             |                     |           |                             |
| <i>Lycalopex vetulus</i>              | 6          | 0        | 6   | 0           | Canastra            | Brazil    | Rocha et al. 2013           |
| <i>Lycalopex vetulus</i>              | 1          | 1        | 0   | 100         | Franca              | Brazil    | Albuquerque & Barretto 1970 |
| <b>INF <i>Lycalopex vetulus</i></b>   | <b>7</b>   | <b>1</b> |     | <b>14.3</b> |                     |           |                             |
| <b>Family FELIDAE</b>                 |            |          |     |             |                     |           |                             |
| <i>Leopardus colocolo</i>             | 5          | 0        | 5   | 0           | Santiago del Estero | Argentina | Wisnivesky-Colli et al 1992 |
| <b>INF <i>Leopardus colocolo</i></b>  | <b>5</b>   | <b>0</b> |     | <b>0</b>    |                     |           |                             |
| <i>Leopardus geoffroyi</i>            | 2          | 0        | 2   | 0           | Chaco Province      | Argentina | Alvarado-Otegui et al. 2012 |
| <i>Leopardus geoffroyi</i>            | 1          | 0        | 1   | 0           | Chaco Province      | Argentina | Diosque et al. 2004         |
| <i>Leopardus geoffroyi</i>            | 4          | 0        | 4   | 0           | Jujuy               | Argentina | Schweigmann et al. 1992     |
| <i>Leopardus geoffroyi</i>            | 7          | 0        | 7   | 0           | Santiago del Estero | Argentina | Wisnivesky-Colli et al 1992 |
| <b>INF <i>Leopardus geoffroyi</i></b> | <b>14</b>  | <b>0</b> |     | <b>0</b>    |                     |           |                             |
| <i>Leopardus pardalis</i>             | 2          | 0        | 2   | 0           | Pantanal            | Brazil    | this study                  |
| <i>Leopardus pardalis</i>             | 1          | 1        | 0   | 100         | Canastra            | Brazil    | Rocha et al. 2013           |
| <i>Leopardus pardalis</i>             | 10         | 0        | 3   | 0           | Pantanal            | Brazil    | Herrera et al. 2011         |
| <i>Leopardus pardalis</i>             | 5          | 0        | 5   | 0           | Pará                | Brazil    | Deane 1961                  |
| <b>INF <i>Leopardus pardalis</i></b>  | <b>18</b>  | <b>1</b> |     | <b>5.6</b>  |                     |           |                             |
| <i>Puma yagouaroundi</i>              | 3          | 0        | 3   | 0           | Santiago del Estero | Argentina | Wisnivesky-Colli et al 1992 |
| <b>INF <i>Puma yagouaroundi</i></b>   | <b>3</b>   | <b>0</b> |     | <b>0</b>    |                     |           |                             |
| <b>Family MEPHITIDAE</b>              |            |          |     |             |                     |           |                             |
| <i>Conepatus chinga</i>               | 15         | 1        | 14  | 7           | Santiago del Estero | Argentina | Cardinal et al. 2008        |
| <i>Conepatus chinga</i>               | 91         | 1        | 91  | 1           | Santiago del Estero | Argentina | Ceballos, et al. 2006       |
| <i>Conepatus chinga</i>               | 1          | 0        | 1   | 0           |                     | Paraguay  | Yeo et al. 2005             |
| <i>Conepatus chinga</i>               | 6          | 0        | 6   | 0           | Chaco Province      | Argentina | Diosque et al. 2004         |
| <i>Conepatus chinga</i>               | 36         | 2        | 34  | 6           | Santiago del Estero | Argentina | Wisnivesky-Colli et al 1992 |
| <i>Conepatus chinga</i>               | 49         | 2        | 47  | 4           | Santiago del Estero | Argentina | Pietrokovsky et al. 1991    |
| <i>Conepatus chinga</i>               | 3          | 0        | 3   | 0           | Til-til             | Chile     | Whiting 1946                |
| <b>INF <i>Conepatus chinga</i></b>    | <b>201</b> | <b>6</b> |     | <b>3.0</b>  |                     |           |                             |

| Species <sup>a</sup>                     | N         | POS      | NEG | (%)         | Site                | Country   | Reference                   |
|------------------------------------------|-----------|----------|-----|-------------|---------------------|-----------|-----------------------------|
| <b>Family MEPHITIDAE</b>                 |           |          |     |             |                     |           |                             |
| <i>Conepatus semistriatus</i>            | 2         | 0        | 2   | 0           | Canastra            | Brazil    | Rocha et al. 2013           |
| <b>INF <i>Conepatus semistriatus</i></b> | <b>2</b>  | <b>0</b> |     | <b>0</b>    |                     |           |                             |
| <b>Family MUSTELIDAE</b>                 |           |          |     |             |                     |           |                             |
| <i>Eira barbara</i>                      | 5         | 1        | 4   | 20          | São Paulo           | Brazil    | Barretto & Ribeiro 1972     |
| <i>Eira barbara</i>                      | 2         | 1        | 1   | 50          | Mato Grosso         | Brazil    | Deane 1964                  |
| <i>Eira barbara</i>                      | 4         | 2        | 2   | 50          | Pará                | Brazil    | Deane 1961                  |
| <i>Eira barbara</i>                      | 4         | 1        | 4   | 25          | Pará                | Brazil    | Rodrigues & Melo 1942       |
| <i>Eira barbara</i>                      | 1         | 1        | 0   | 100         | Jujuy               | Argentina | Mazza 1940                  |
| <b>INF <i>Eira barbara</i></b>           | <b>16</b> | <b>6</b> |     | <b>37.5</b> |                     |           |                             |
| <i>Galictis cuja</i>                     | 1         | 0        | 1   | 0           | Corrientes          | Argentina | Bar et al. 1999             |
| <i>Galictis cuja</i>                     | 2         | 0        | 2   | 0           | Jujuy               | Argentina | Schweigmann et al. 1992     |
| <i>Galictis cuja</i>                     | 1         | 1        | 0   | 100         | Santiago del Estero | Argentina | Wisnivesky-Colli et al 1992 |
| <i>Galictis cuja</i>                     | 14        | 2        | 12  | 14          | São Paulo           | Brazil    | Ferriolli & Barretto 1969   |
| <b>INF <i>Galictis cuja</i></b>          | <b>18</b> | <b>3</b> |     | <b>16.7</b> |                     |           |                             |
| <i>Galictis vittata</i>                  | 1         | 1        | 0   | 100         | Sumidouro/RJ        | Brazil    | Lisboa et al. 2009          |
| <i>Galictis vittata</i>                  | 1         | 1        | 0   | 100         | São Paulo           | Brazil    | Barretto & Albuquerque 1971 |
| <i>Galictis vittata</i>                  | 3         | 0        | 3   | 0           | Pará                | Brazil    | Deane 1961                  |
| <b>INF <i>Galictis vittata</i></b>       | <b>5</b>  | <b>2</b> |     | <b>40</b>   |                     |           |                             |
| <i>Mustela Africana</i>                  | 4         | 0        | 4   | 0           | Pará                | Brazil    | Deane 1961                  |
| <b>INF <i>Mustela Africana</i></b>       | <b>4</b>  | <b>0</b> |     | <b>0</b>    |                     |           |                             |
| <b>Family PROCYONIDAE</b>                |           |          |     |             |                     |           |                             |
| <i>Nasua nasua</i>                       | 66        | 19       | 49  | 29          | Pantanal            | Brazil    | this study                  |
| <i>Nasua nasua</i>                       | 140       | 53       | 87  | 38          | Pantanal            | Brazil    | Alves et al. 2011           |
| <i>Nasua nasua</i>                       | 158       | 33       | 125 | 21          | Pantanal            | Brazil    | Herrera et al. 2008         |
| <i>Nasua nasua</i>                       | 18        | 7        | 11  | 39          | Pará                | Brazil    | Lainson et al. 1979         |
| <i>Nasua nasua</i>                       | 5         | 1        | 0   | 20          | São Paulo           | Brazil    | Ferriolli & Barretto 1968   |
| <i>Nasua nasua</i>                       | 2         | 0        | 2   | 0           | Pará                | Brazil    | Deane 1961                  |

| Species <sup>a</sup>                  | N          | POS        | NEG | (%)         | Site           | Country            | Reference                   |
|---------------------------------------|------------|------------|-----|-------------|----------------|--------------------|-----------------------------|
| <b>Family PROCYONIDAE</b>             |            |            |     |             |                |                    |                             |
| <i>Nasua nasua</i>                    | 2          | 0          | 2   | 0           | Pará           | Brazil             | Rodrigues & Melo 1942       |
| <b>INF <i>Nasua nasua</i></b>         | <b>391</b> | <b>113</b> |     | <b>28.9</b> |                |                    |                             |
| <i>Potos flavus</i>                   | 2          | 1          | 0   | 50          | Bajo Colima    | Colombia           | Travi et al. 1994           |
| <i>Potos flavus</i>                   | 2          | 0          | 2   | 0           |                | Guiana<br>Francesa | Deurere et al. 2001         |
| <i>Potos flavus</i>                   | 1          | 0          | 1   | 0           | Pará           | Brazil             | Lainson et al. 1979         |
| <i>Potos flavus</i>                   | 2          | 0          | 2   | 0           | Pará           | Brazil             | Rodrigues & Melo 1942       |
| <b>INF <i>Potos flavus</i></b>        | <b>7</b>   | <b>1</b>   |     | <b>14.3</b> |                |                    |                             |
| <i>Procyon cancrivorus</i>            | 13         | 2          | 11  | 15          | Pantanal       | Brazil             | this study                  |
| <i>Procyon cancrivorus</i>            | 2          | 0          | 2   | 0           | Chaco Province | Argentina          | Alvarado-Otegui et al. 2012 |
| <i>Procyon cancrivorus</i>            | 4          | 1          | 3   | 25          | São Paulo      | Brazil             | Barretto & Ferriolli 1970   |
| <i>Procyon cancrivorus</i>            | 12         | 0          | 12  | 0           | Pará           | Brazil             | Deane 1961                  |
| <b>INF <i>Procyon cancrivorus</i></b> | <b>31</b>  | <b>3</b>   |     | <b>9.7</b>  |                |                    |                             |

Footnote:

<sup>a</sup> We adopted Wilson & Reeder (2005) for taxonomic reference; thus, host species names reported in this table not always correspond to the original paper.

### References Table S2

Albuquerque RD, Barretto MP (1968) Studies on wild reservoirs and vectors of "*Trypanosoma cruzi*." XXX: natural infection of the bush dog, "*Cerdocyon thous azarae*" (Wied, 1824) by "*T. cruzi*". Rev Bras Biol 28: 457-468.

Albuquerque RD, Barretto MP (1970) Studies on wild reservoirs and vectors of *Trypanosoma cruzi*. XLIV. Natural infection of the field fox, *Dusicyon (Lycalopex) vetulus* (Lung, 1842) by *T. cruzi*. Rev Inst Med Trop Sao Paulo 12: 375-382.

Alvarado-Otegui JA, Ceballos LA, Orozco MM, Enriquez GF, Cardinal MV, Cura C, Schijman AG, Kitron U, Gurtler RE (2012) The sylvatic transmission cycle of *Trypanosoma cruzi* in a rural area in the humid Chaco of Argentina. Acta Trop 124: 79-86.

- Alves FM, Olifiers N, Bianchi RC, Duarte AC, Cotias PM, D'Andrea PS, Gompper ME, Mourao GM, Herrera HM, Jansen AM (2011) Modulating variables of *Trypanosoma cruzi* and *Trypanosoma evansi* transmission in free-ranging Coati (*Nasua nasua*) from the Brazilian Pantanal region. *Vector Borne Zoonotic Dis* 11: 835-841.
- Bar ME, Alvarez BM, Oscherov EB, Damborsky MP, Jorg ME (1999) Contribución al conocimiento de los reservorios del *Trypanosoma cruzi* (Chagas, 1909) en la Provincia de Corrientes, Argentina. *Rev. Soc. Bras. Med. Trop.* 32(3): 271–276.
- Barretto MP, Albuquerque RD (1971) Studies on reservoirs and wild vectors of *Trypanosoma cruzi*. XLVII. Natural infection of the mustelid, *Galictis vittata braziliensis* (Thunberg, 1820) by *T. cruzi*. *Rev Inst Med Trop Sao Paulo* 13: 346-351.
- Barretto MP, Ferriolli FF (1970) Studies on wild reservoirs and vectors of *Trypanosoma cruzi*. XXXIX: Natural infection of *Procyon cancrivorus nigripes* Mivart, 1885, by *T. cruzi*. *Rev Bras Biol* 30: 431-438.
- Barretto MP, Ribeiro RD (1972) Studies on wild reservoirs and vectors of *Trypanosoma cruzi*. LI. Natural infection of the mustelid, *Eira barbara barbara* (Lin., 1758) by *T. cruzi*. *Rev Bras Biol* 32: 413-418.
- Cardinal MV, Lauricella MA, Ceballos LA, Lanati L, Marcet PL, Levin MJ, Kitron U, Gurtler RE, Schijman AG (2008) Molecular epidemiology of domestic and sylvatic *Trypanosoma cruzi* infection in rural northwestern Argentina. *Int J Parasitol* 38: 1533-1543.
- Ceballos LA, Cardinal MV, Vazquez-Prokopec GM, Lauricella MA, Orozco MM, Cortinas R, Schijman AG, Levin MJ, Kitron U, Gurtler RE (2006) Long-term reduction of *Trypanosoma cruzi* infection in sylvatic mammals following deforestation and sustained vector surveillance in northwestern Argentina. *Acta Trop* 98: 286-296.
- Deane LM (1961) Tripanosomídeos de mamíferos da região amazônica. I – Alguns flagelados encontrados no sangue de mamíferos silvestres do Estado do Pará. *Rev Inst Med Trop Sao Paulo* 3: 15-28.
- Deane LM (1964) Animal reservoirs of *Trypanosoma cruzi* in Brazil. *Rev Bras Malariol Doencas Trop* 16: 27-48.
- Dereure J, Barnabé C, Vié JC, Madélenat F, Raccurt C. (2001) Trypanosomatidae from wild mammals in the neotropical rainforest of French Guiana. *Annals of tropical medicine and parasitology* 95(2):157–66.

- Diosque P, Padilla AM, Cimino RO, Cardozo RM, Negrette OS, Marco JD, et al. (2004) Chagas disease in rural areas of Chaco Province, Argentina: epidemiologic survey in humans, reservoirs, and vectors. *Amer J Trop Med Hyg* 71(5): 590-593.
- Ferriolli FF, Barretto MP (1968) Studies on wild reservoirs and vectors of *Trypanosoma cruzi*. XXIX. Natural infection of *Nasua nasua solitaria* Schinz 1821 by *T. cruzi*. *Rev Inst Med Trop Sao Paulo* 10: 354-363.
- Ferriolli FF, Barretto MP (1969) Studies on wild reservoirs and vectors of *Trypanosoma cruzi*. XXXV. Natural infection of the ferret *Galictis cuja furax* (Thomas, 1907) by *T. cruzi*. *Rev Inst Med Trop Sao Paulo* 11: 264-273.
- Herrera HM, Lisboa CV, Pinho AP, Olifiers N, Bianchi RC, Rocha FL, Mourao GM, Jansen AM (2008) The coati (*Nasua nasua*, Carnivora, Procyonidae) as a reservoir host for the main lineages of *Trypanosoma cruzi* in the Pantanal region, Brazil. *Trans R Soc Trop Med Hyg* 102: 1133-1139.
- Herrera HM, Rocha FL, Lisboa CV, Rademaker V, Mourao GM, Jansen AM (2011) Food web connections and the transmission cycles of *Trypanosoma cruzi* and *Trypanosoma evansi* (Kinetoplastida, Trypanosomatidae) in the Pantanal Region, Brazil. *Trans R Soc Trop Med Hyg* 105: 380-387.
- Lainson R, Shaw JJ, Fraiha H, Miles MA, Draper CC (1979) Chagas's Disease in the Amazon Basin: 1. *Trypanosoma cruzi* infections in silvatic mammals, triatomine bugs and man in the State of Para, north Brazil. *Trans R Soc Trop Med Hyg* 73: 193-204.
- Lisboa CV, Xavier SC, Herrera HM, Jansen AM (2009) The ecology of the *Trypanosoma cruzi* transmission cycle: Dispersion of zymodeme 3 (Z3) in wild hosts from Brazilian biomes. *Vet Parasitol* 165: 19-24.
- Mazza S (1940) Otros mamíferos infectados naturalmente por *Schizotrypanum cruzi*, o *cruzi* similares en provincias de Jujuy y Salta. *Misión de estudios de Patología Regional Argentina - M.E.P.R.A.* 119-34.
- Neghme A, Schenone H (1962) Enfermedad de Chagas en Chile: veinte años de investigación. *Ann Congr Int Doença de Chagas* 3: 1069-1105.
- Petrokovsky SM, Schweigmann NJ, Riarte A, Alberti A, Conti O, Montoya S, Wisnivesky-Colli C (1991) The skunk *Conepatus chinga* as new host of *Trypanosoma cruzi* in Argentina. *J Parasitol* 77: 643-645.

- Rocha FL, Roque AL, Arrais RC, Santos JP, Lima VD, Xavier SC, Cordeiro-Estrela P, D'Andrea PS, Jansen AM (2013) *Trypanosoma cruzi* TcI and TcII transmission among wild carnivores, small mammals and dogs in a conservation unit and surrounding areas, Brazil. *Parasitology* 140: 160-170.
- Rodrigues BA, Melo GB. (1942) Contribuição ao estudo da Tripanosomiase americana. *Mem Inst Oswaldo Cruz.* 37(1):77–93.
- Schweigmann NJ, Alberti A, Pietrokovsky SM, Conti O, Montoya S, Wisnivesky-Colli C (1992) A new host of *Trypanosoma cruzi* from Jujuy, Argentina: *Octodontomys gliroides* (Gervais & D'orbigny, 1844) (Rodentia, Octodontidae). *Mem Inst Oswaldo Cruz.* 87(2): 217–20.
- Travi BL, Jaramillo C, Montoya J, Segura I, Zea A, Goncalves A, Velez ID (1994) *Didelphis Marsupialis*, an important reservoir of *Trypanosoma (Schizotrypanum) cruzi* and *Leishmania (Leishmania) chagasi* in Colombia. *Amer J Trop Med Hyg* 50: 557-565.
- Whiting C (1946) Contribución al estudio de las reservas de parasitos de la enfermedad de Chagas en Chile. Primeiros hallazgos en Chile de mamiferos silvestres infestados por *Trypanosoma cruzi*. *Rev Chil Hig Med Prev* 8: 69-100.
- Wilson DE, Reeder DM(editors) (2005) *Mammal Species of the World. A Taxonomic and Geographic Reference.* Johns Hopkins University Press. 2142 p.
- Wisnivesky-Colli C, Schweigmann NJ, Alberti A, Pietrokovsky SM, Conti O, Montoya S, Riarte A, Rivas C (1992) Sylvatic American trypanosomiasis in Argentina. *Trypanosoma cruzi* infection in mammals from the Chaco forest in Santiago del Estero. *Trans R Soc Trop Med Hyg* 86: 38-41.
- Yeo M, Acosta N, Llewellyn M, Sanchez H, Adamson S, Miles GA, Lopez E, Gonzalez N, Patterson JS, Gaunt MW, de Arias AR, Miles MA (2005) Origins of Chagas disease: *Didelphis* species are natural hosts of *Trypanosoma cruzi* I and armadillos hosts of *Trypanosoma cruzi* II, including hybrids. *Int J Parasitol* 35: 225-233.
